# Supplementary material for: Somatic mutations and copy number variations in breast cancers with heterogeneous HER2 amplification
Source: PubMed Central journal article supplement (PMC7138394; doi:10.1002/1878-0261.12650), 2020-03-05

PATIENT 6

A

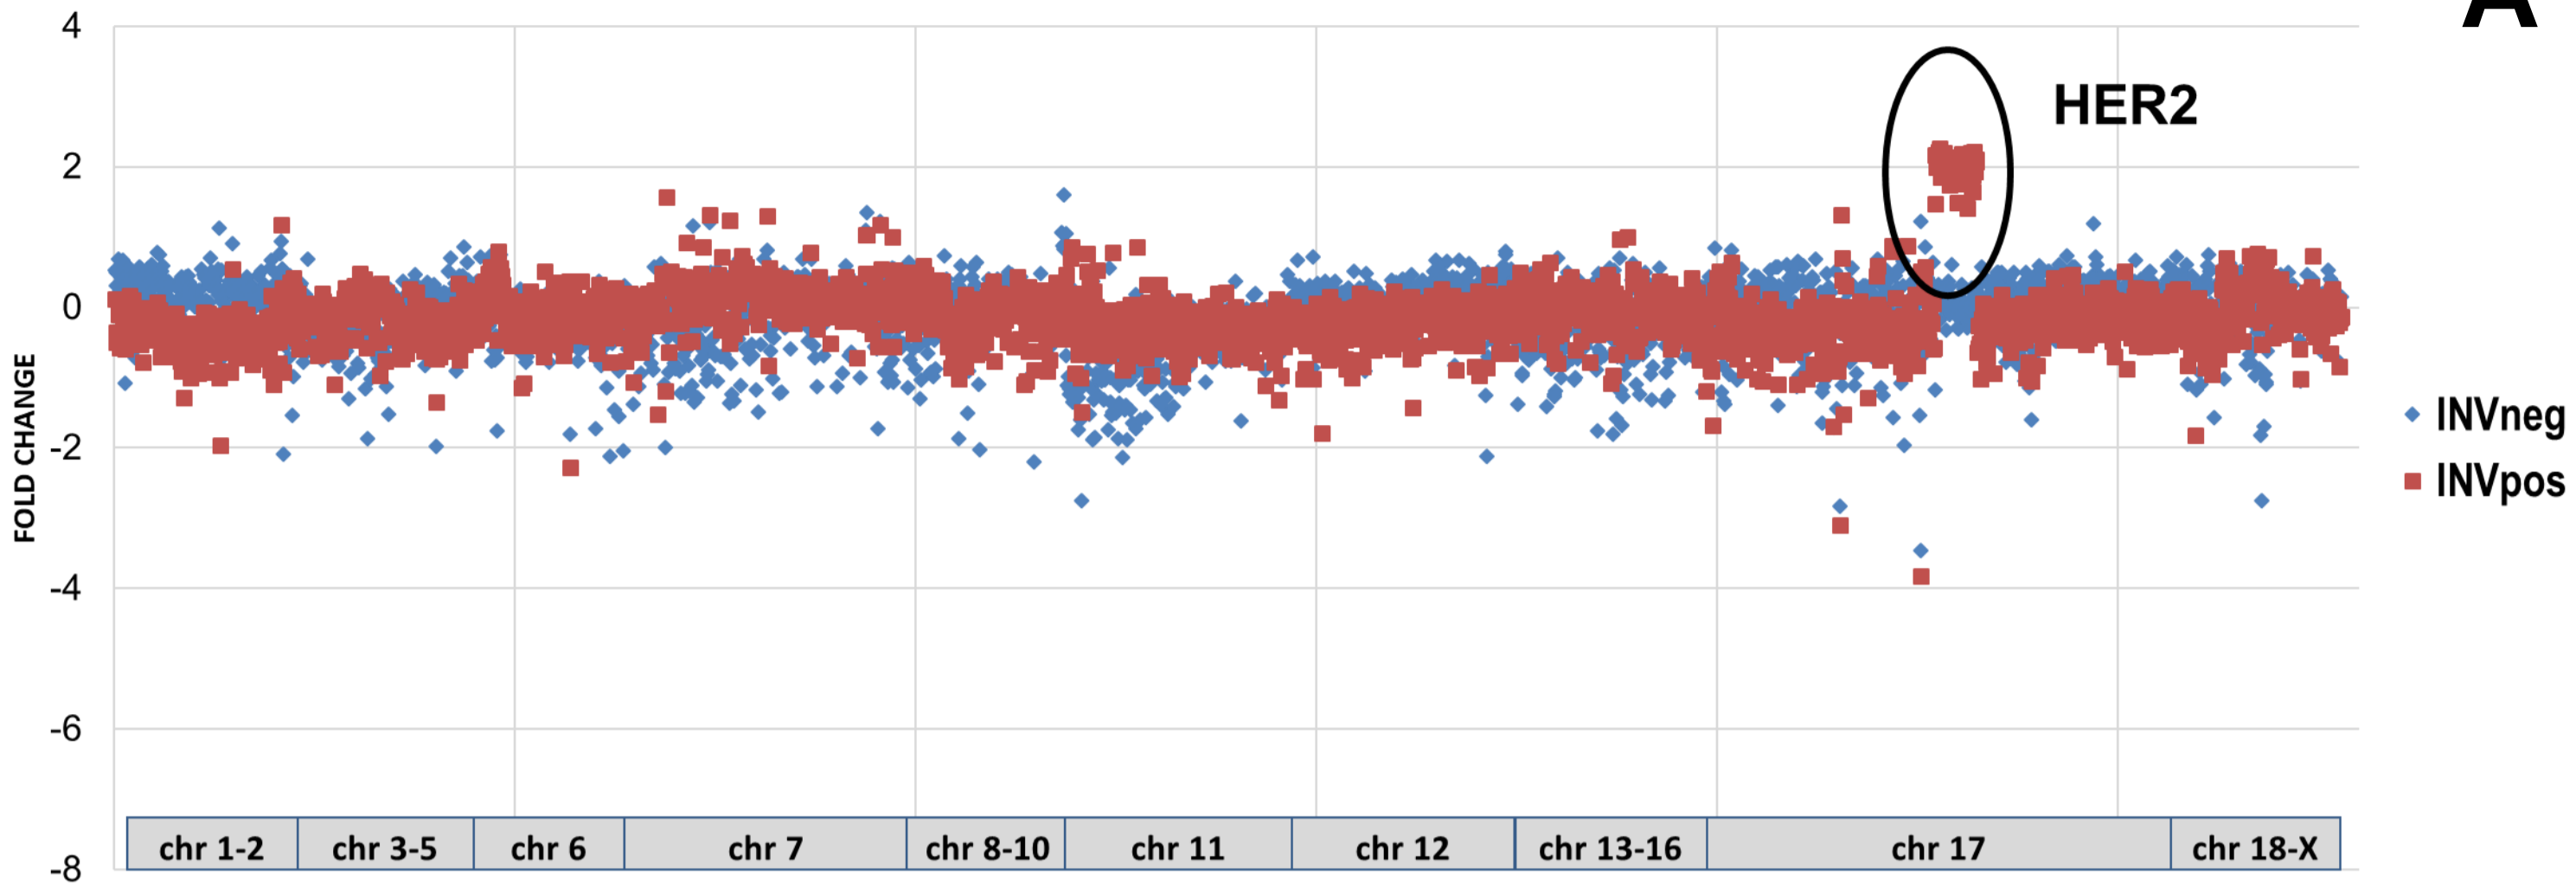

HER2-negative

HER2-positive

B

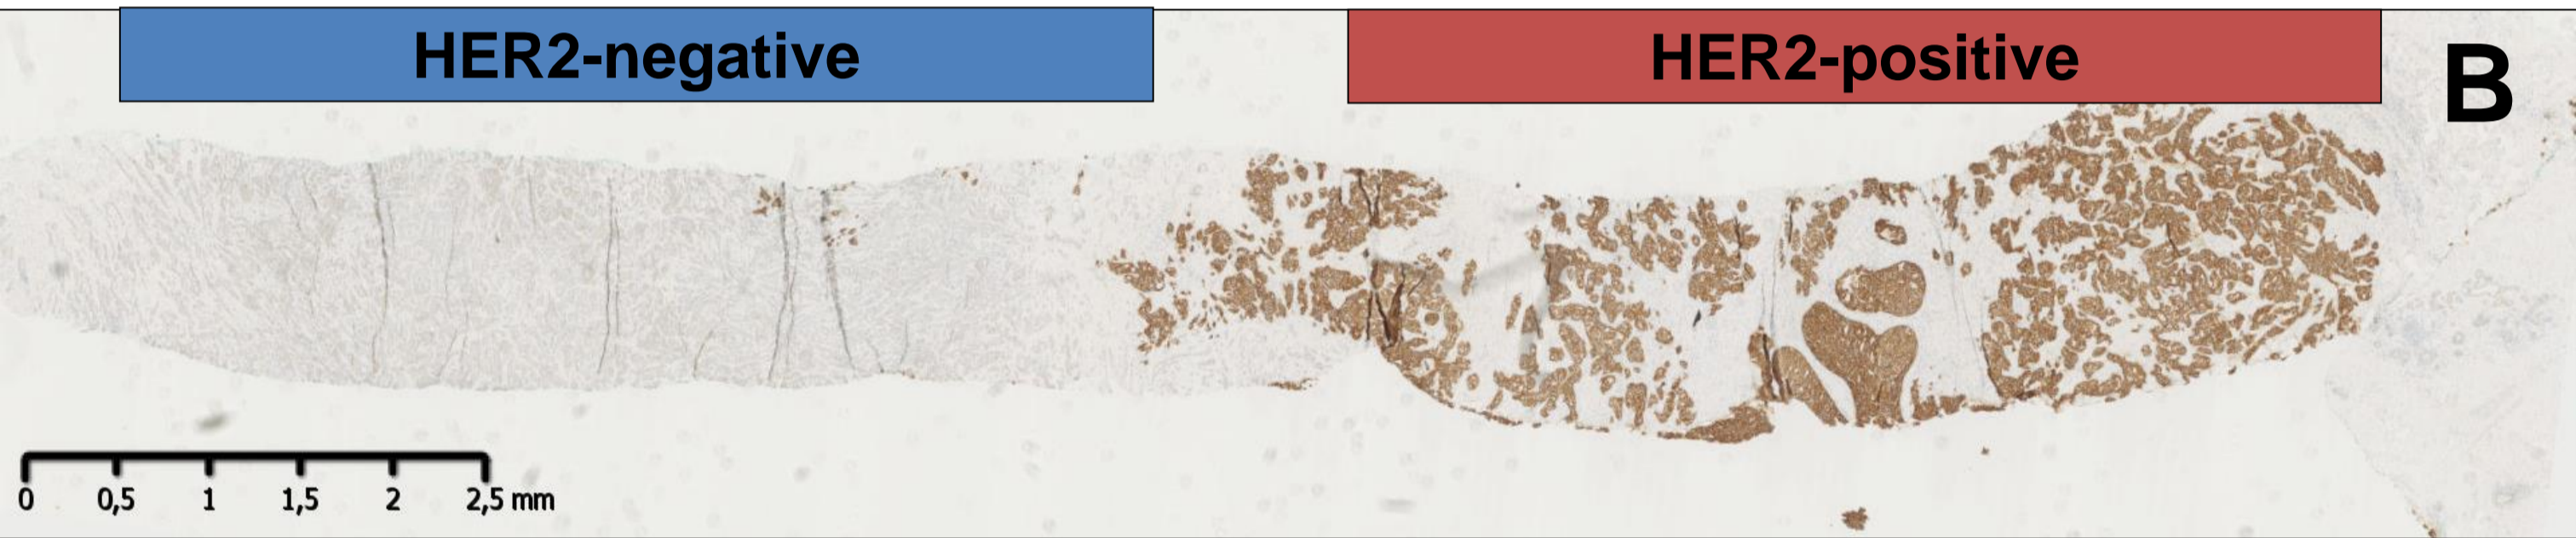

oestrogen receptor-positive

oestrogen receptor-negative

C

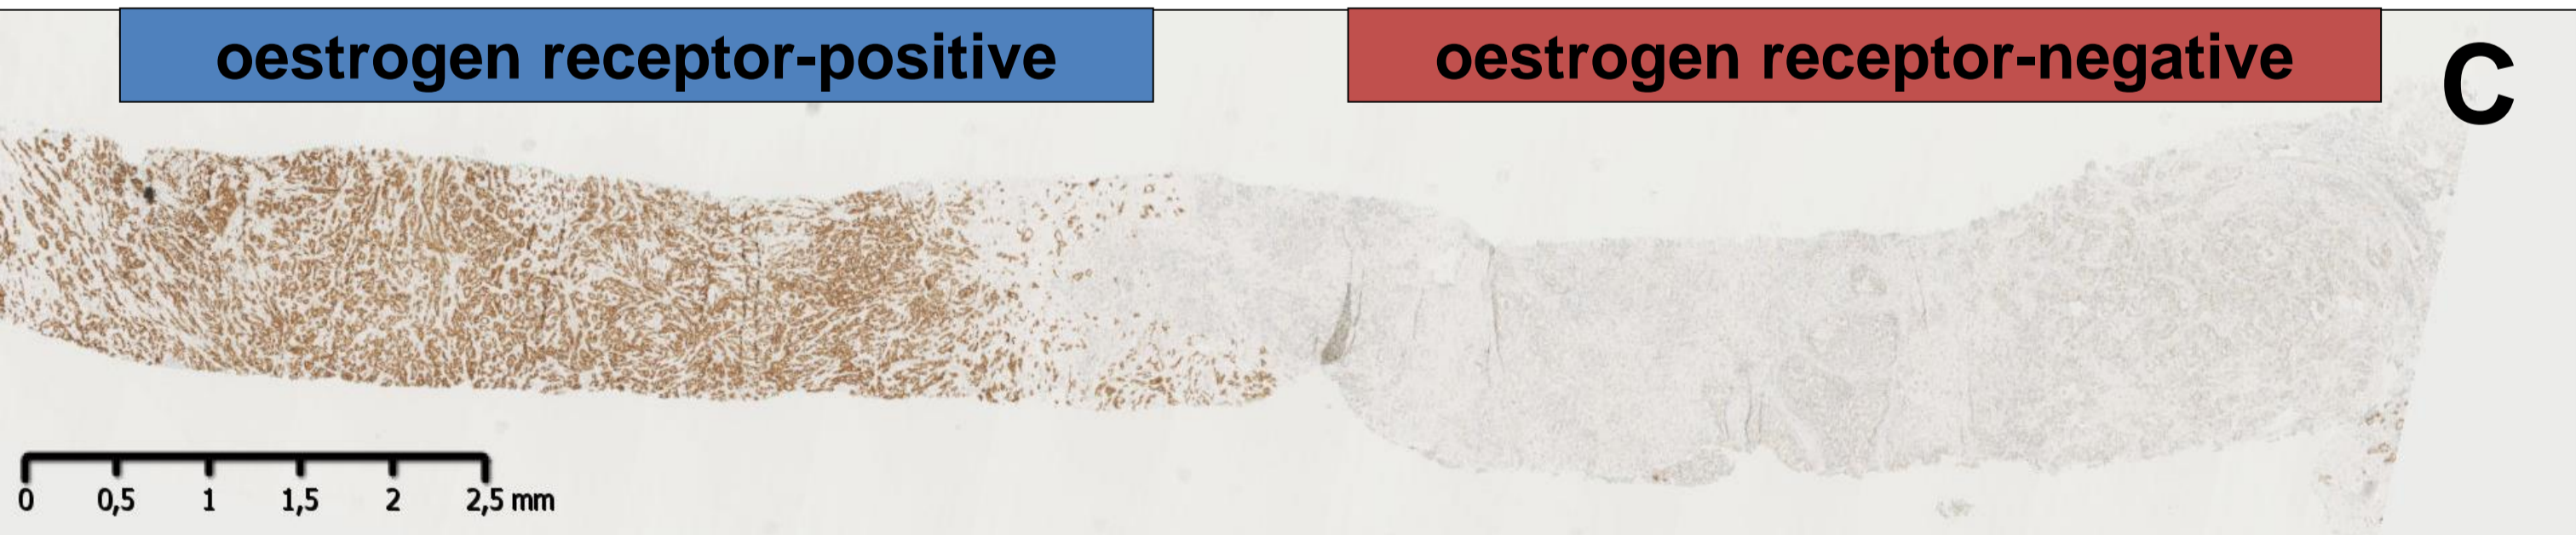

progesterone receptor-positive

progesterone receptor-negative

D

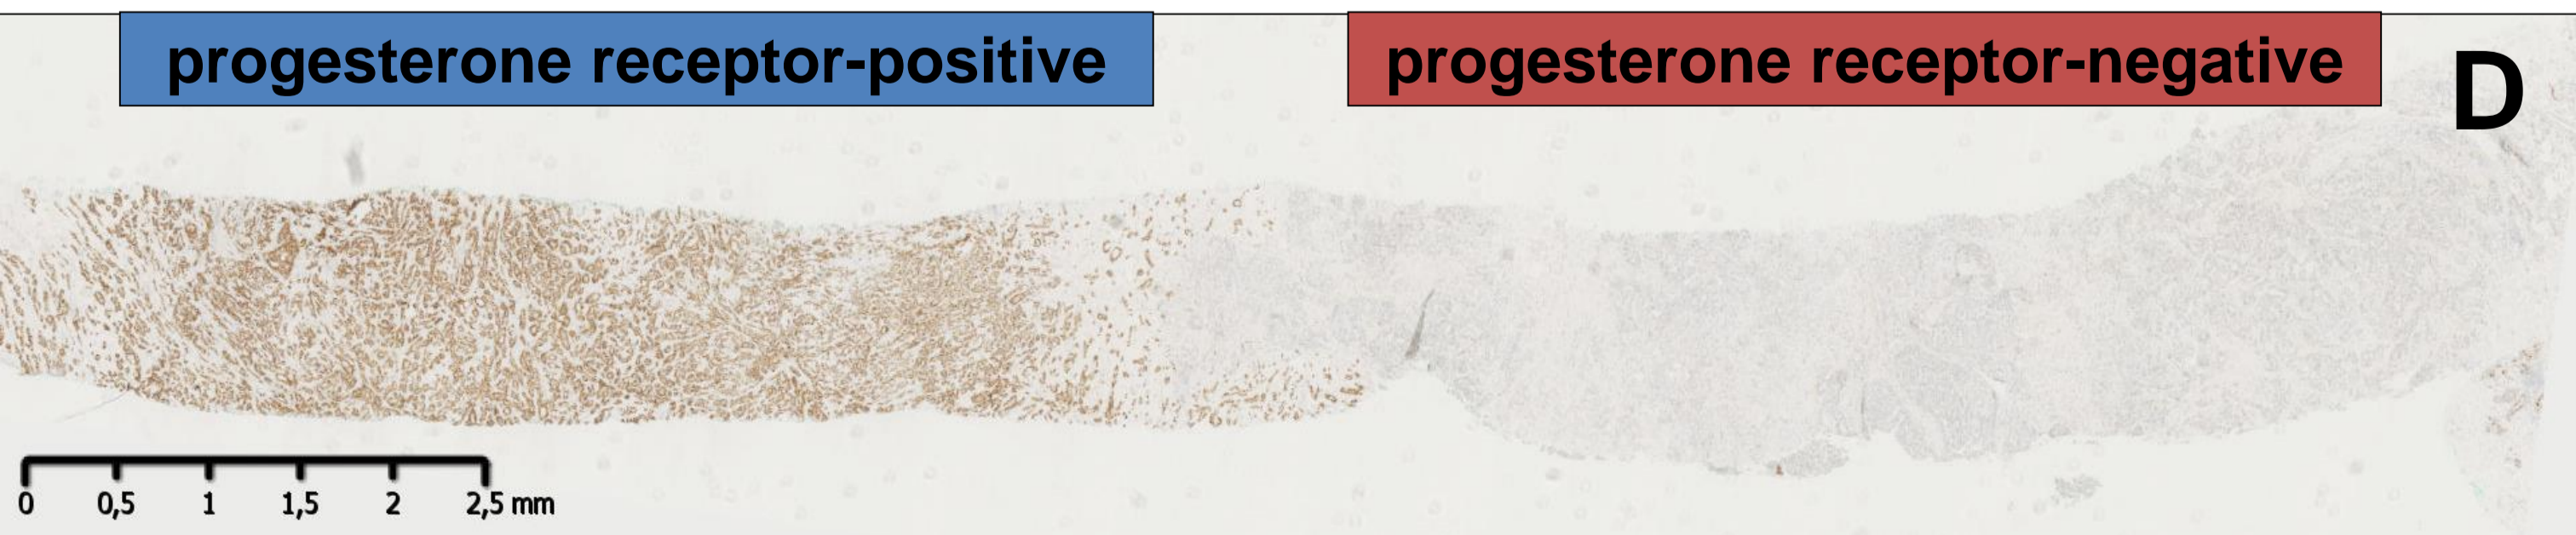

Supplement: MOL2-14-671-s001.pdf [file MOL2-14-671-s001.pdf]
