# Supplementary material for: Somatic mutations and copy number variations in breast cancers with heterogeneous HER2 amplification
Source: PubMed Central journal article supplement (PMC7138394; doi:10.1002/1878-0261.12650), 2020-03-05

### PATIENT 5

# A

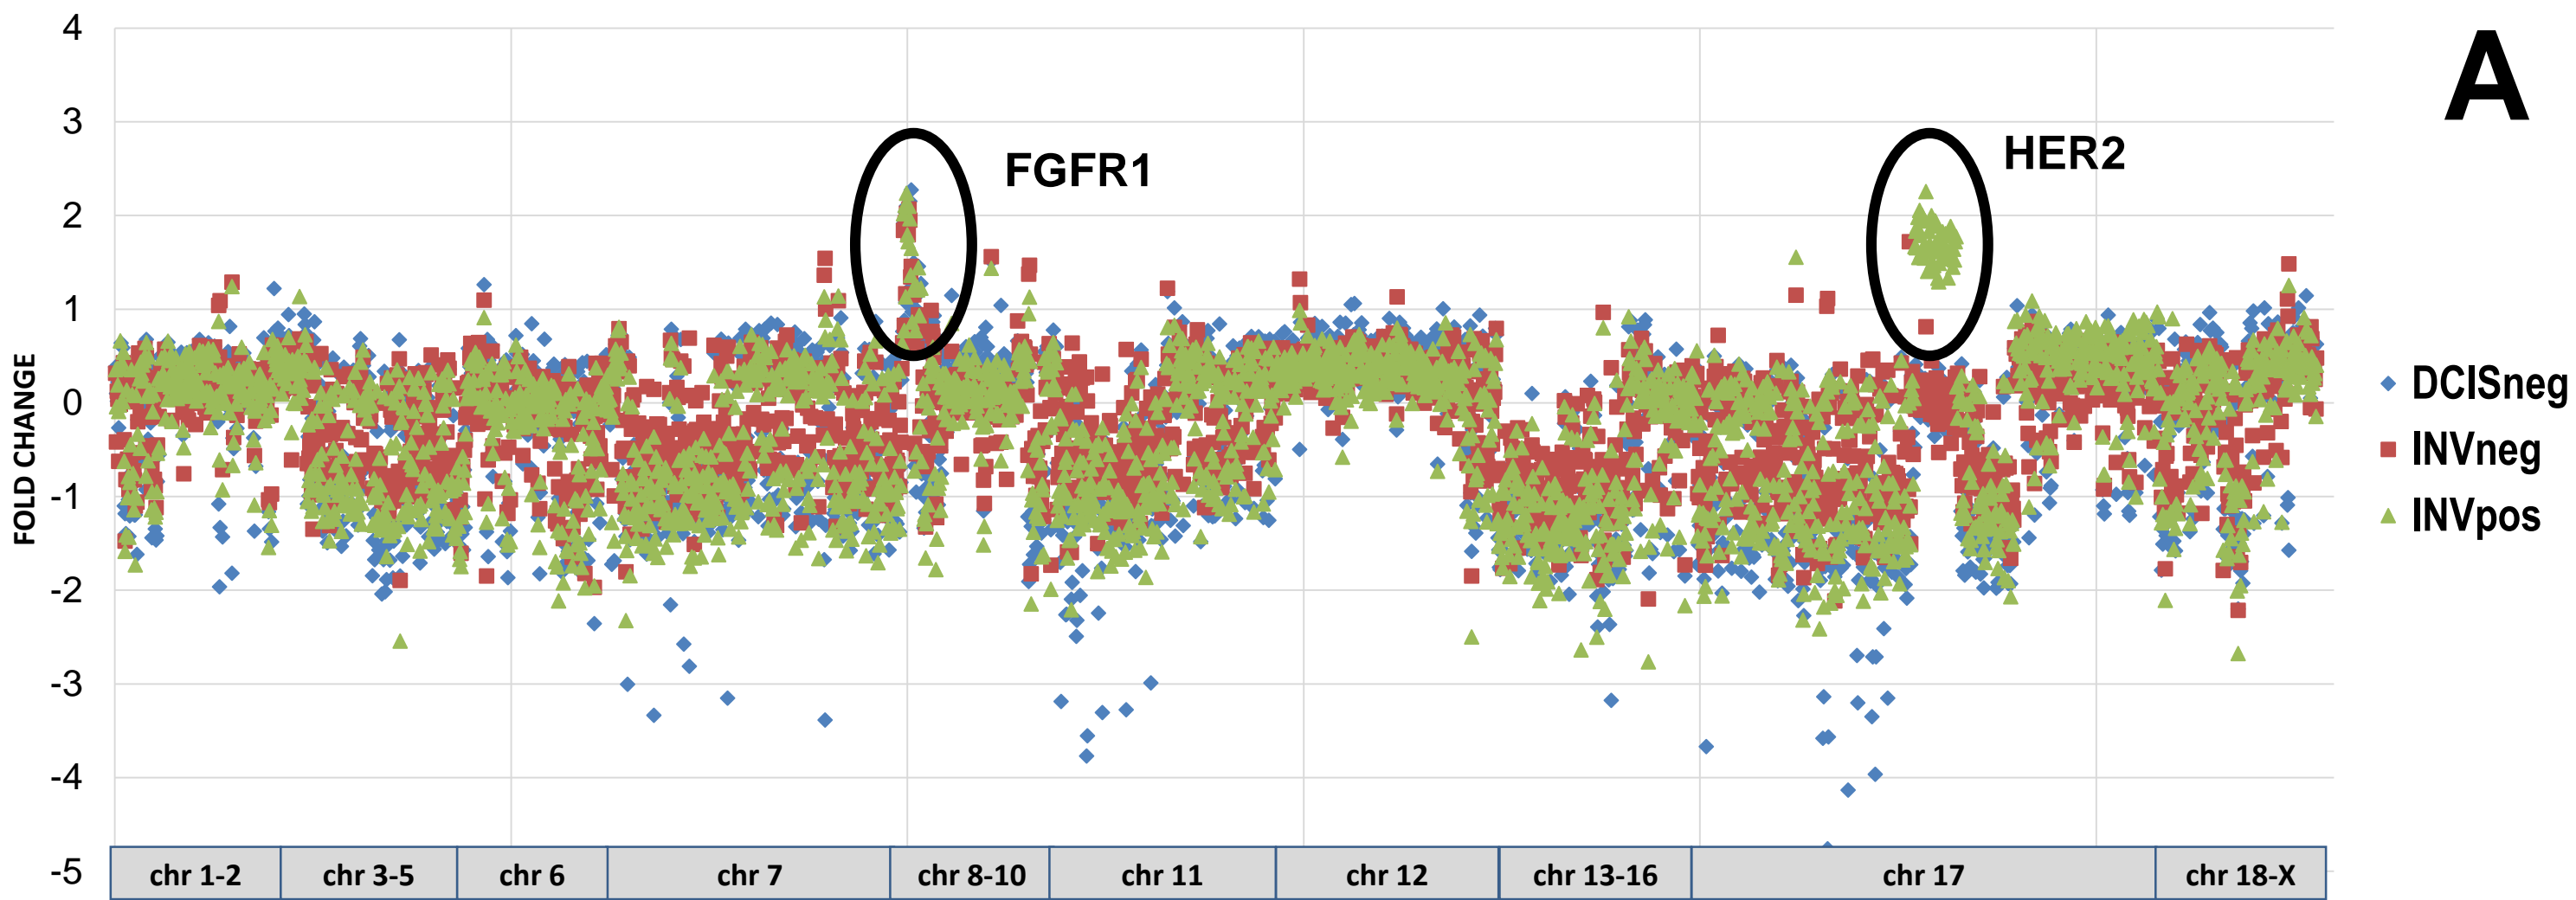

### PATIENT 9

# B

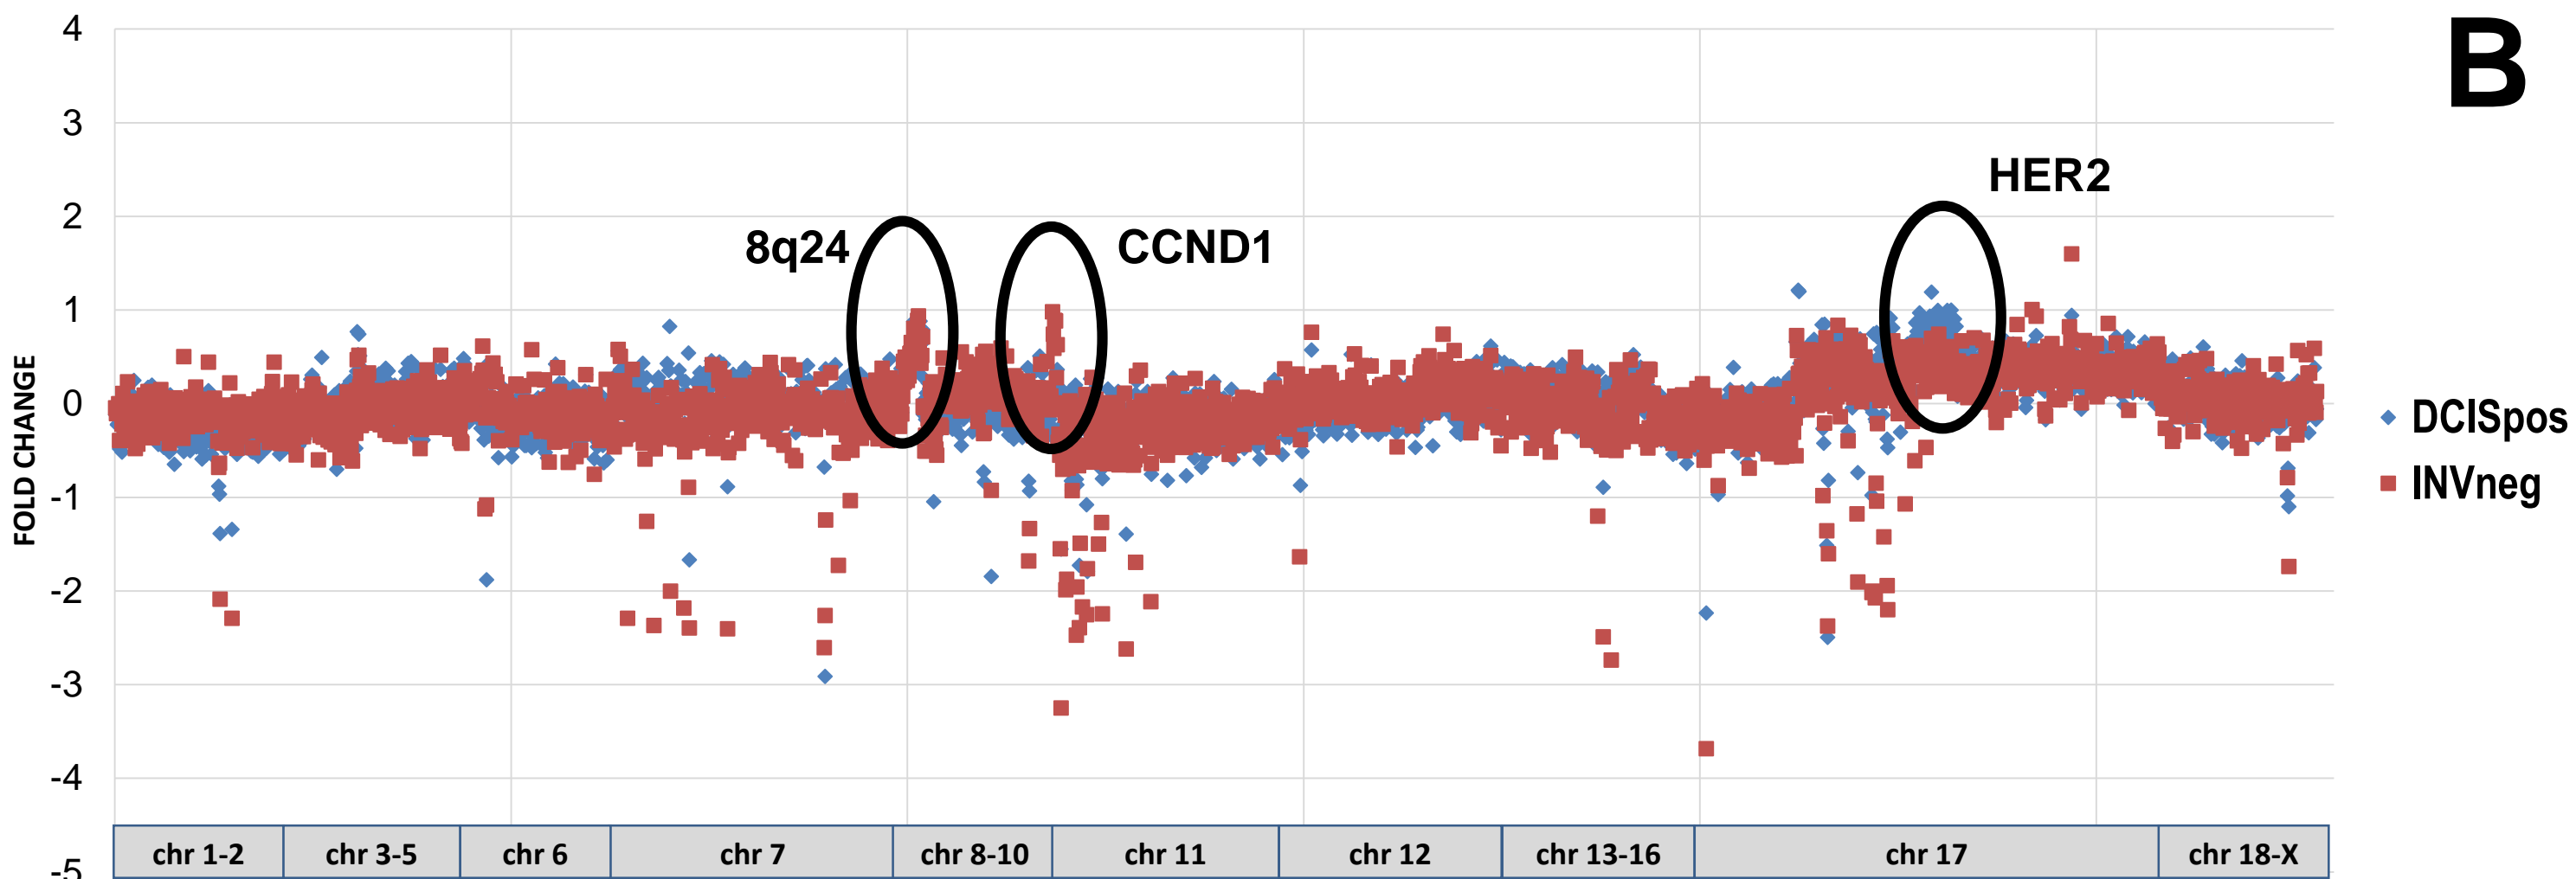

### PATIENT 10

# C

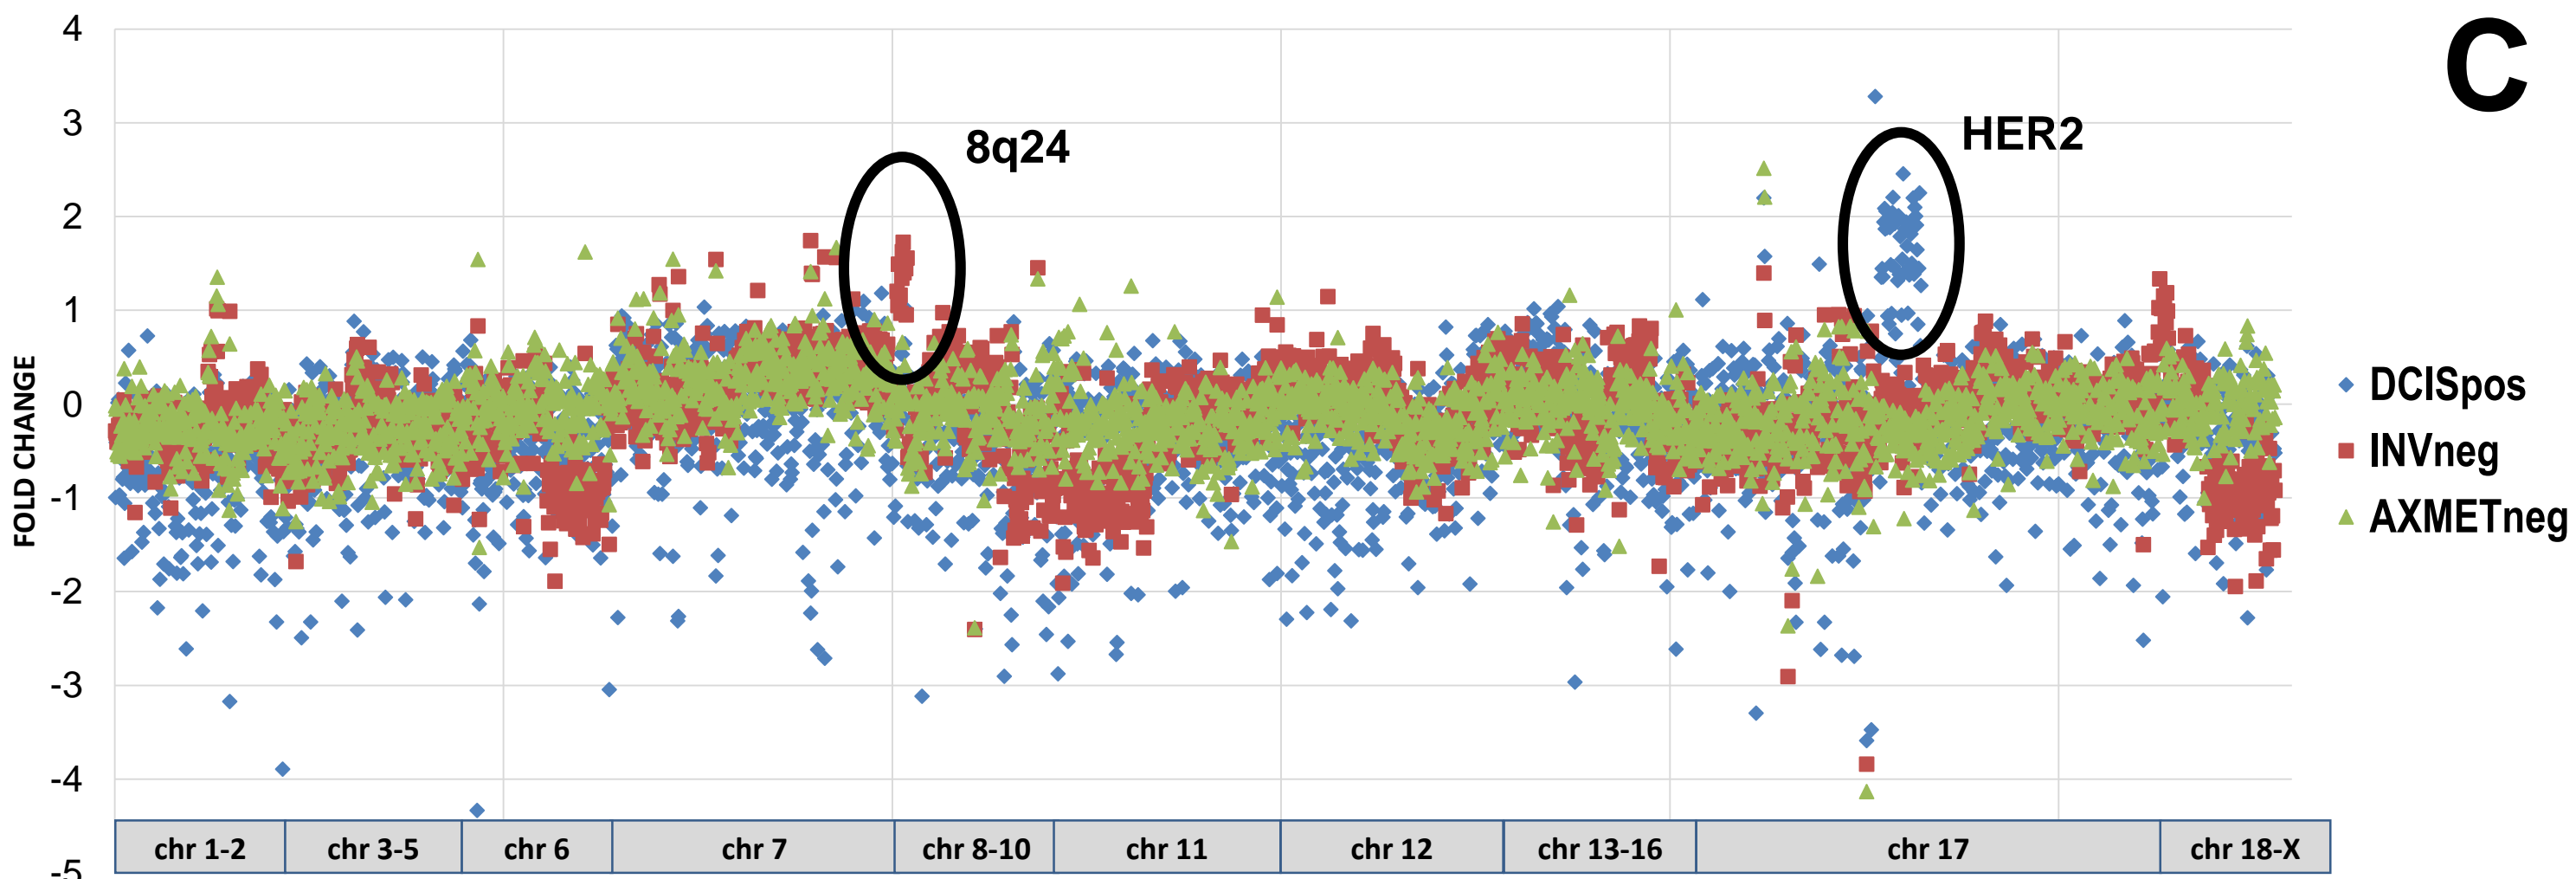

Supplement: MOL2-14-671-s002.pdf [file MOL2-14-671-s002.pdf]
